# Supplementary material for: Amplitude multiplexed wastewater surveillance for campus health: tracking SARS-CoV-2, influenza A, and norovirus
Source: Royal Society of Chemistry journal article supplement (doi:10.1039/d4ew00096j), 2024-03-15
Supplement: d4ew00096j1.pdf [file d4ew00096j1.pdf]

## Supporting Information

### Amplitude Multiplexed Wastewater Surveillance for Campus Health:

### Tracking SARS-CoV-2, Influenza A, and Norovirus

Michael A. Saldana<sup>a</sup>, Jiayu Geng<sup>a</sup>, Litao Shen<sup>a</sup>, Angie Ghanem-Uzqueda<sup>b</sup>, Sarah Van Orman<sup>b</sup>, Kimberly B. Tilley<sup>b</sup>, Dick Sun<sup>c</sup>, Deona Willes<sup>c</sup>, and Adam L. Smith<sup>a\*</sup>

<sup>a</sup>Sonny Astani Department of Civil and Environmental Engineering, University of Southern California: 920 Downey Way; BHE 201 Los Angeles, CA 90089

<sup>b</sup>Keck School of Medicine, University of Southern California: 1975 Zonal Ave, Los Angeles, CA 90033

<sup>c</sup>Environmental Health and Safety, University of Southern California: 3434 S. Grand Avenue, CAL 120 Los Angeles, CA 90089

\*Corresponding author

[smithada@usc.edu](mailto:smithada@usc.edu)

920 Downey Way; BHE 221

Los Angeles, CA 90089

15

16

17

18

19

20

21

22

23 **Environmental Microbiology Minimum Information (EMMI)(1) checklist:**

24 • **Environmental Sampling**

- 25 ○ Sampling procedure: section 2.2
- 26 ○ Number of samples: section 3.2
- 27 ○ Sample amount, mean, range: SI Table 8
- 28 ○ Sampling locations, dates: SI Table 9

29 • **Sample Treatment**

- 30 ○ Performed: section 2.3
- 31 ○ Treatment procedure: section 2.3
- 32 ○ Reagents: section 2.3

33 • **Sample Reduction**

- 34 ○ Performed: section 2.3
- 35 ○ Reduction procedure: section 2.3
- 36 ○ Reagents: section 2.3
- 37 ○ Concentration factor: NA

38 • **Nucleic Acid Extraction**

- 39 ○ Extraction procedure: section 2.3
- 40 ○ Amount extracted; amount obtained: section 2.3
- 41 ○ Extract storage conditions: -20°C

42 • **Reverse Transcription**

- 43 ○ One or two-step: two-step
- 44 ○ cDNA storage conditions: -20°C
- 45 ○ Reaction temperatures and times: SI Table 3
- 46 ○ Reaction reagents and concentrations: SI Table 3
- 47 ○ Priming method: SI Table 3 and section 2.3
- 48 ○ Reaction volume; added template amount: SI Table 3

49 • **dPCR**

- 50 ○ Target gene name, amplicon length: SI Table 2
- 51 ○ Thermocycling temperature and times: SI Table 4
- 52 ○ Master mix: composition, vendors, concentrations: SI Table 4 and section 2.3
- 53 ○ Additives: vendors, concentrations: NA
- 54 ○ Template amount added, pre-treatment (if any): SI Table 4 and section 2.3
- 55 ○ Primers and probes—sequences, concentrations, vendors, references: SI Table
- 56 4
- 57 ○ Instrumentation: section 2.3
- 58 ○ Equivalent volume of sample analyzed by PCR: ~2 mL

59 • **Analysis—dPCR**

- 60 ○ Threshold settings: SI Table 7
- 61 ○ Technical replicates, number, well merging: section 2.3
- 62 ○ Partitions measured, number, mean, variance: Not analyzed
- 63 ○ Partition volume: Not analyzed
- 64 ○ Target copies per partition, mean, variance: Not analyzed
- 65 ○ Program used for dPCR analysis: Section 2.3
- 66 ○ Explanation of control results, example plots: Figure 2 and SI Figure 5

67 **SI Figure 1: Graphical output of amplitude multiplex with FAM and HEX at 20x and 10x**  
68 **probe concentrations.**

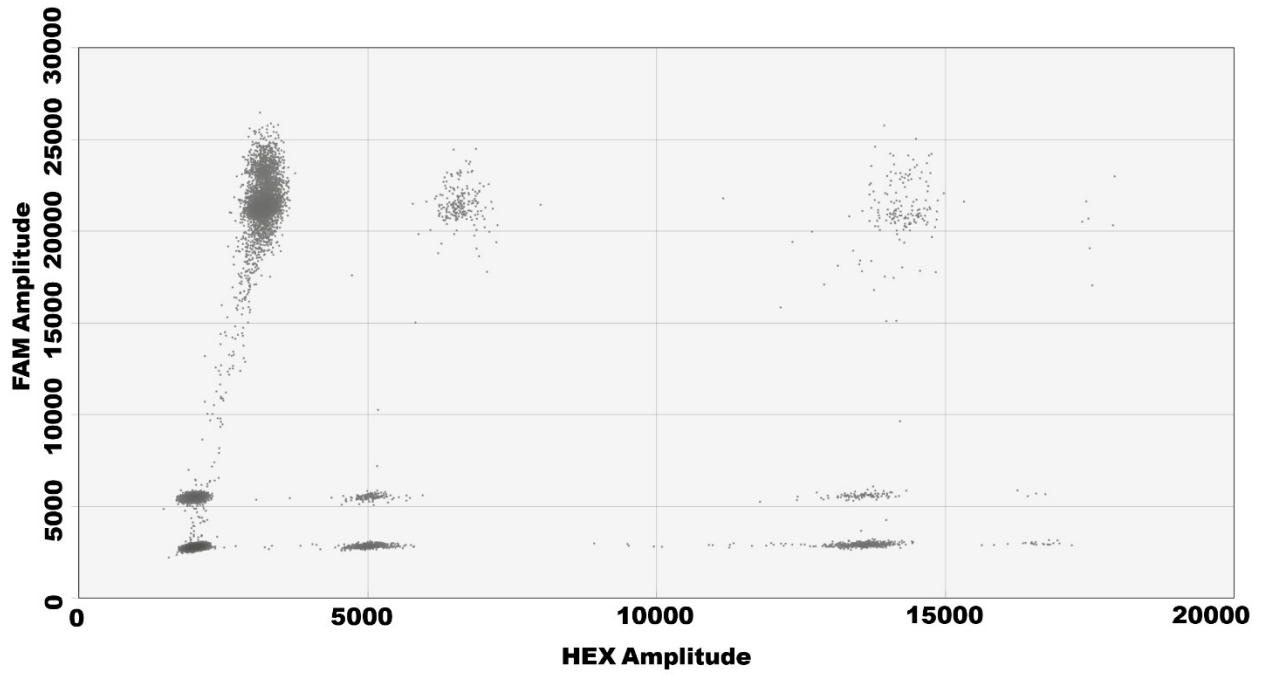

69  
70  
71  
72  
73  
74  
75  
76  
77  
78  
79  
80  
81  
82  
83  
84

85 SI Figure 2: Temperature gradient of amplitude multiplex with FAM and HEX at 20x and  
86 12.5x probe concentrations. The selected temperature for use is highlighted.

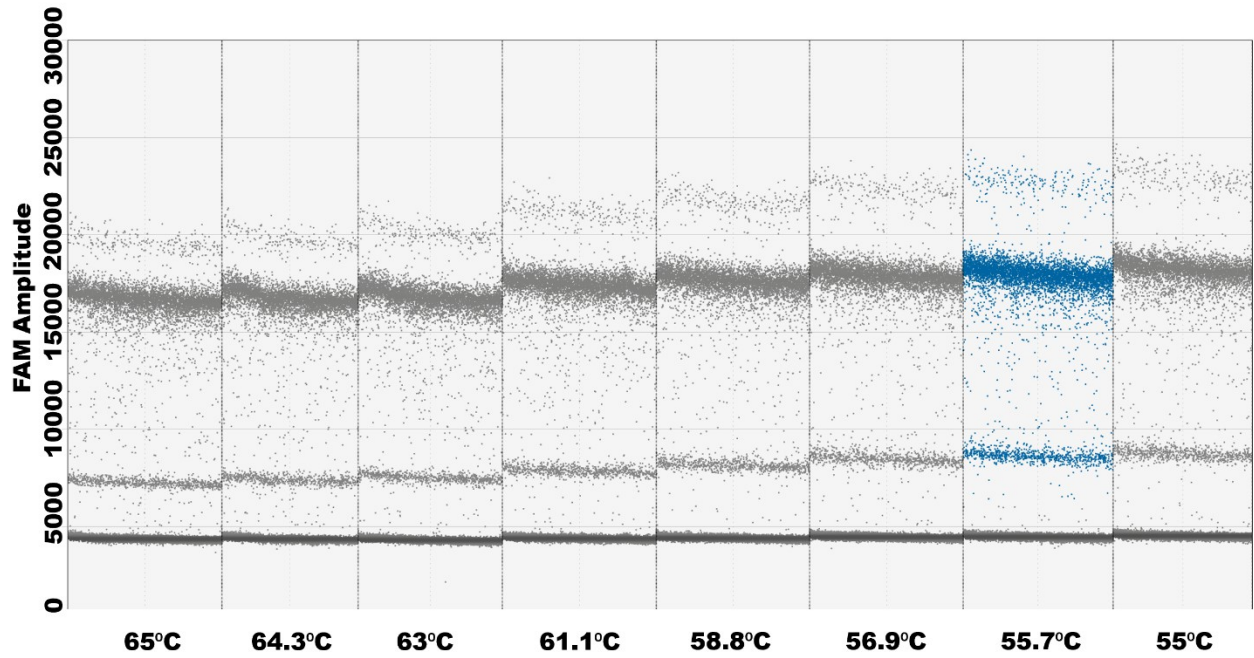

87

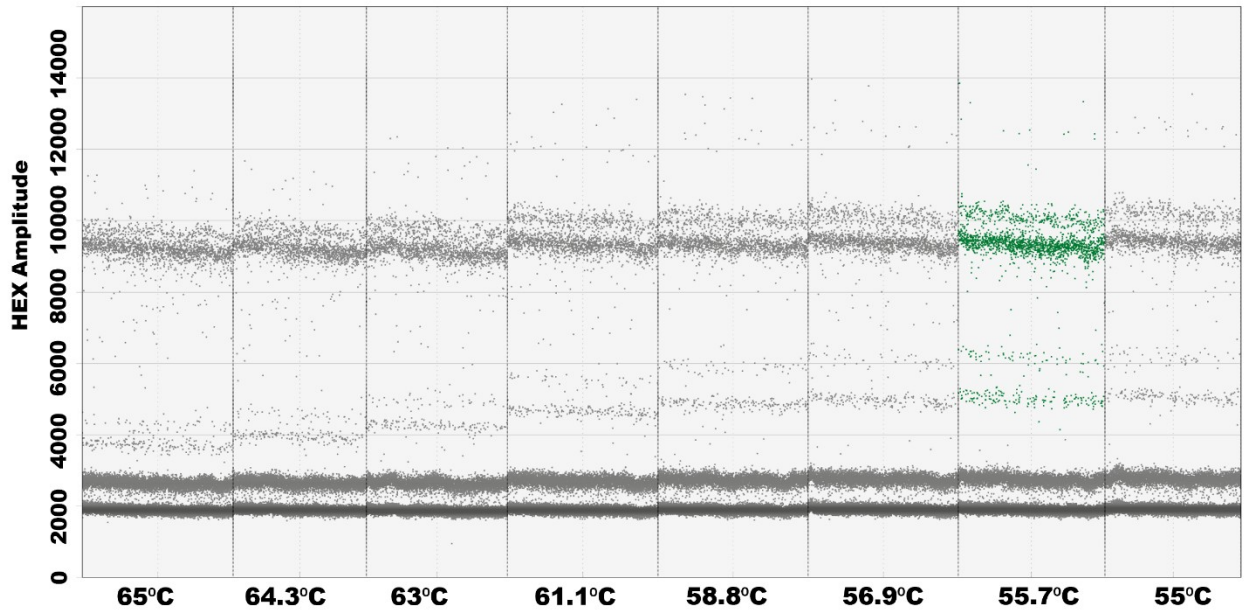

88

89

90

91

92

93 **SI Figure 3: Every monitored building's result described as percentage of the total**  
 94 **samples collected at each site.**

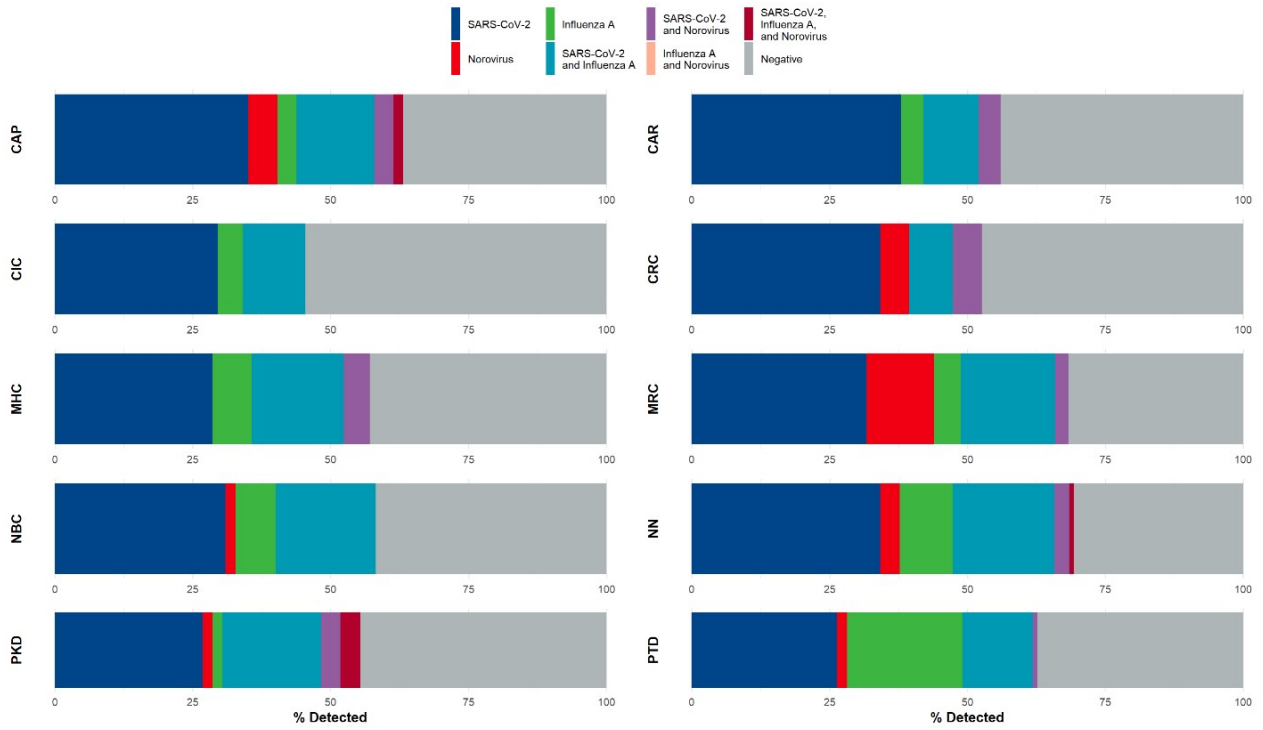

95  
 96  
 97  
 98  
 99  
 100  
 101  
 102  
 103  
 104  
 105  
 106  
 107  
 108  
 109  
 110

111 **SI Figure 4: No correlation is found when comparing the average number of residents per**  
112 **bathroom against the average viral load per resident in each building.**

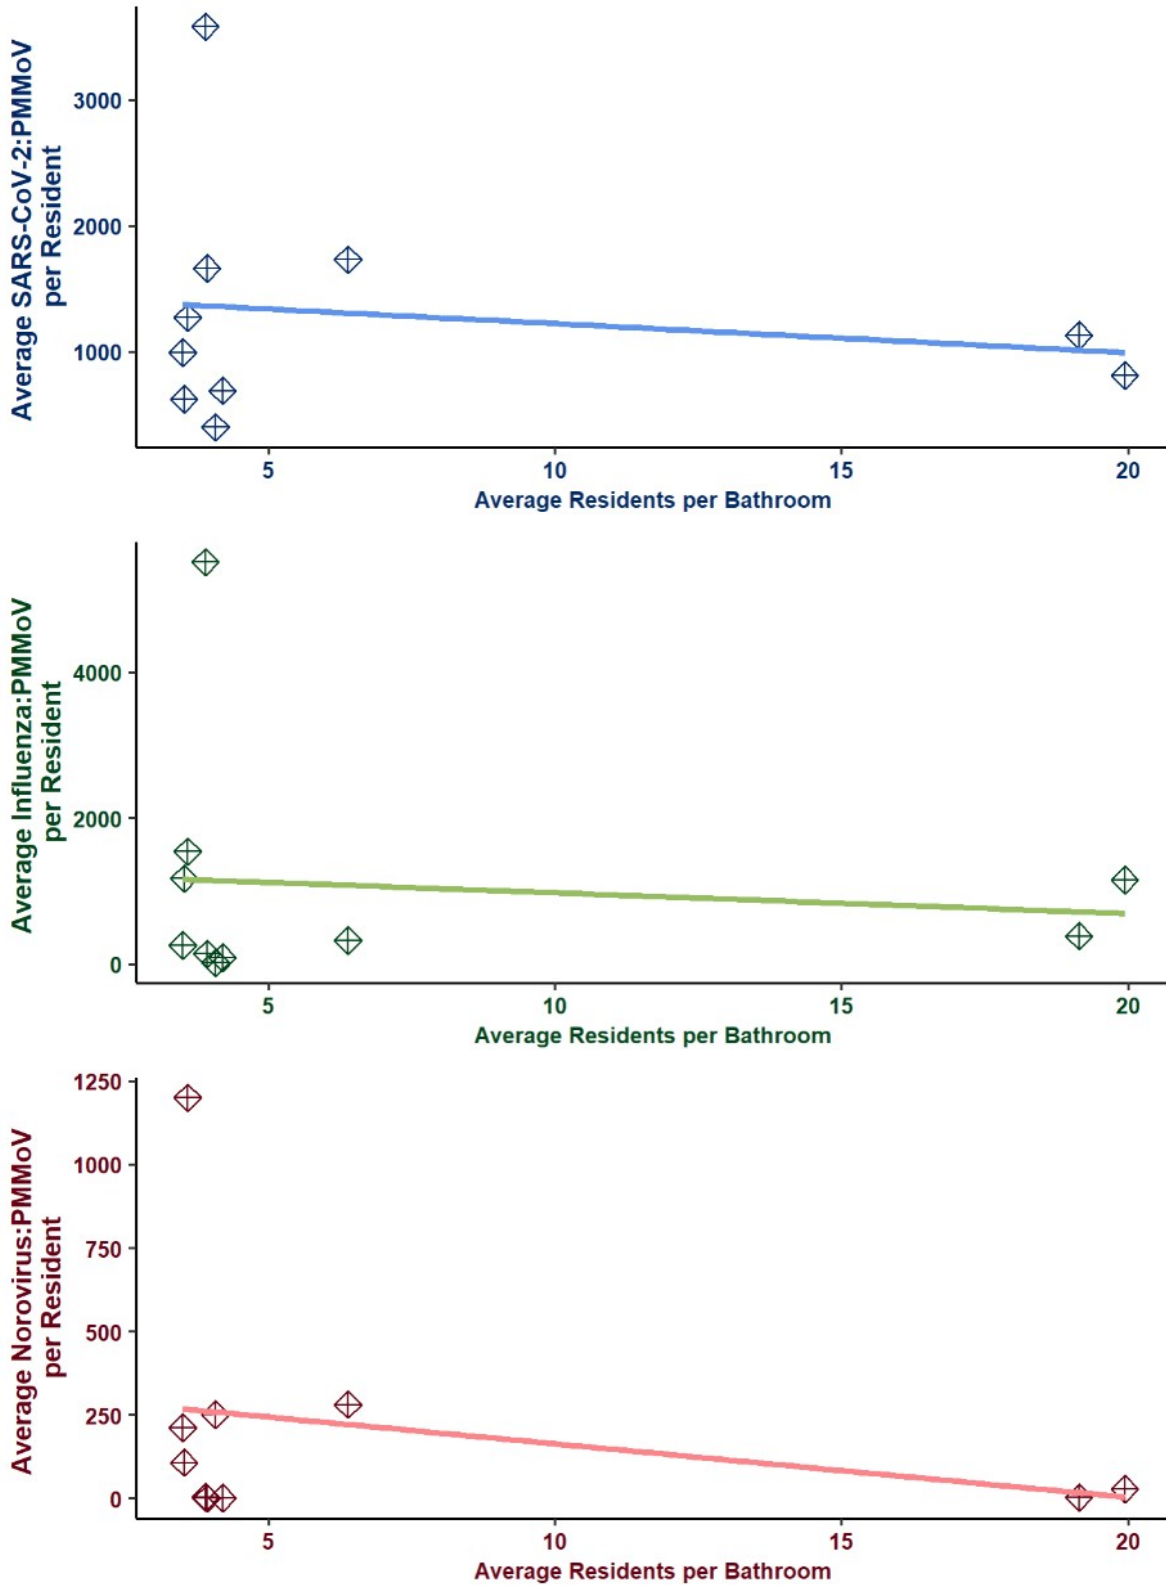

114 **SI Figure 5: Possible 2D graphical outcomes from amplitude multiplex. Text above each**  
115 **image describes the positives and fluorophore designation.**

116 PMMoV (HEX-Lo)

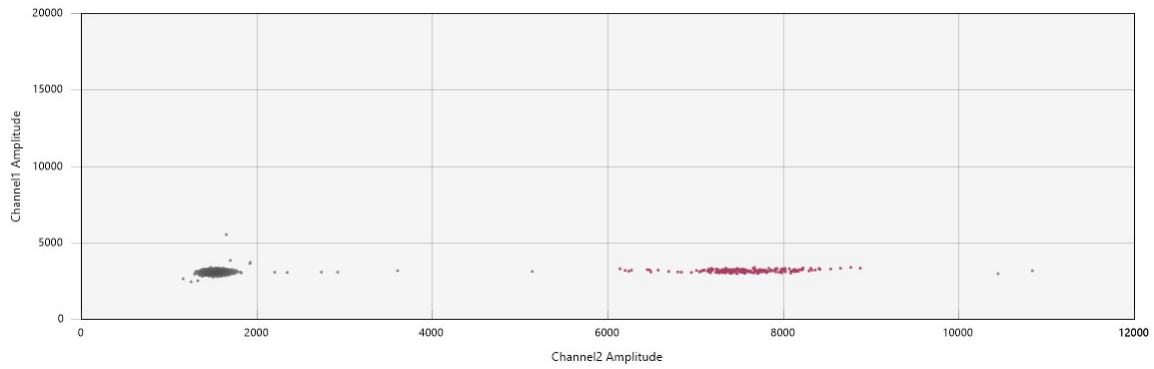

117

118 SARS-CoV-2 (FAM-Hi)

119

120

121

122

123

124

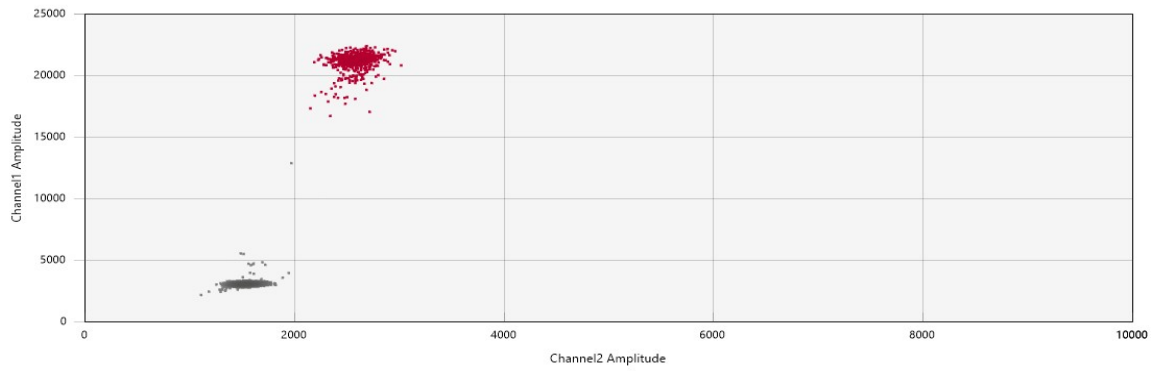

125

126 Influenza A (HEX-Hi)

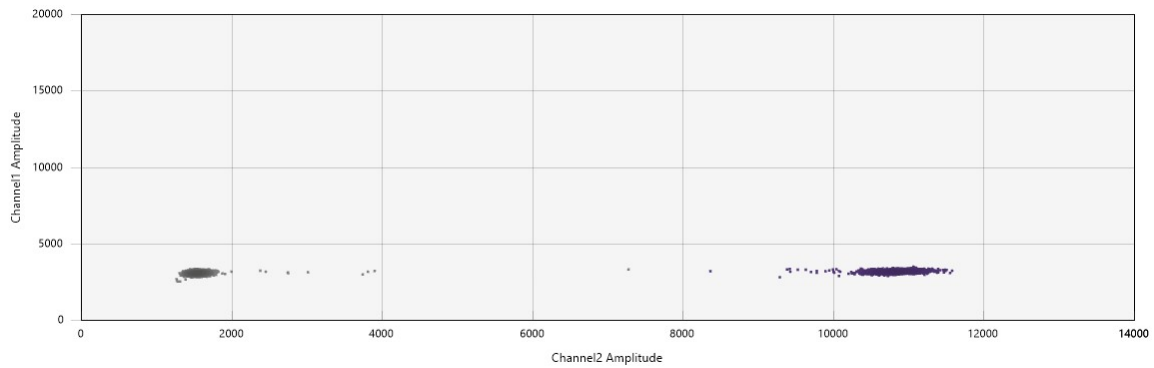

127

128 Norovirus (FAM-Lo)

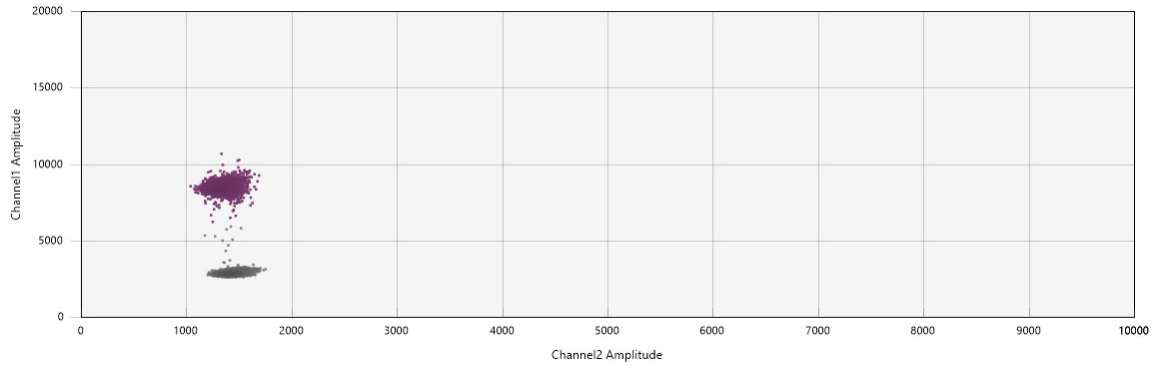

129

130 SARS-CoV-2 (FAM-Hi), influenza A (HEX-Hi)

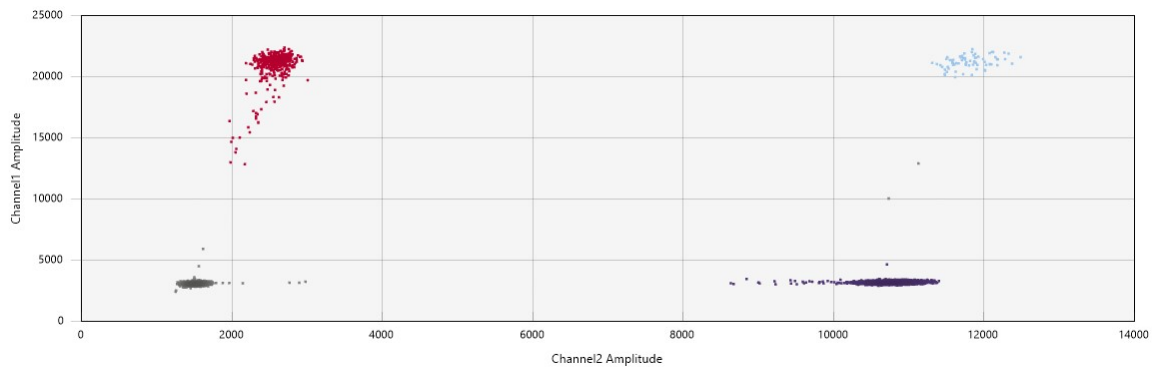

131

132 SARS-CoV-2 (FAM-Hi), norovirus (FAM-Lo)

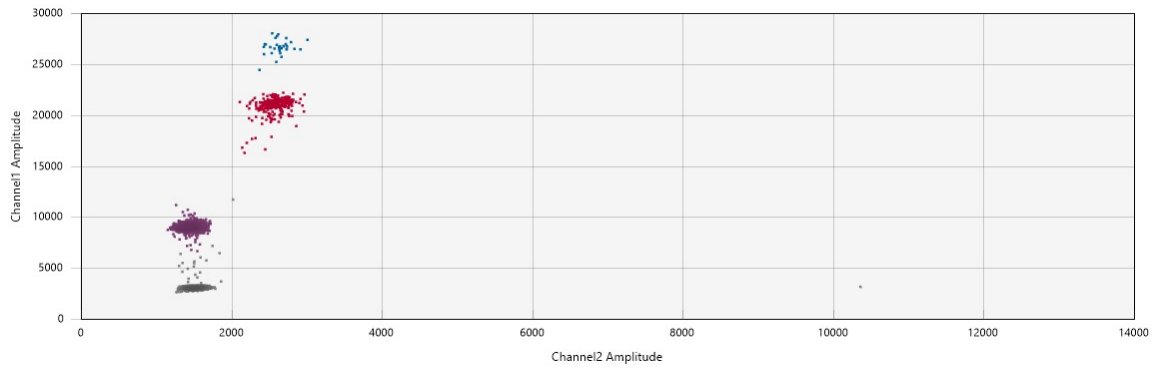

133

134

135

136

137

138

139



140 SARS-CoV-2 (FAM-Hi), PMMoV (HEX-Lo)

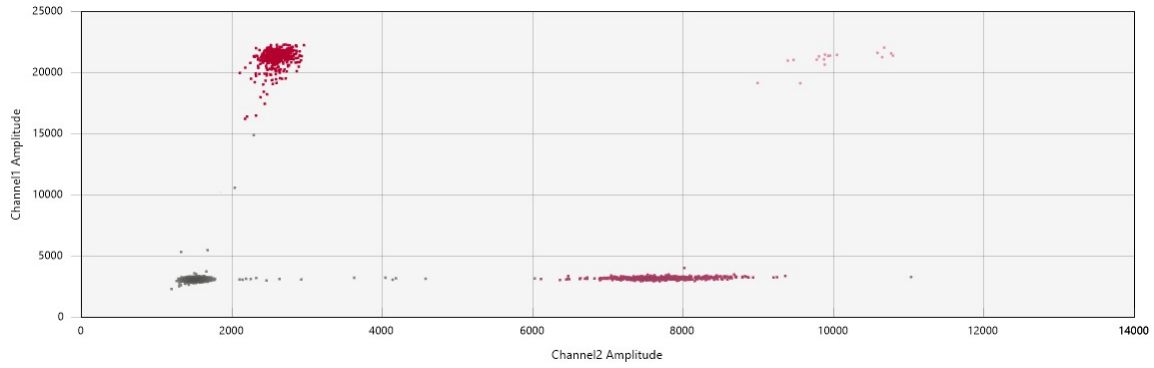

141

142 Norovirus (FAM-Lo), influenza A (HEX-Hi)

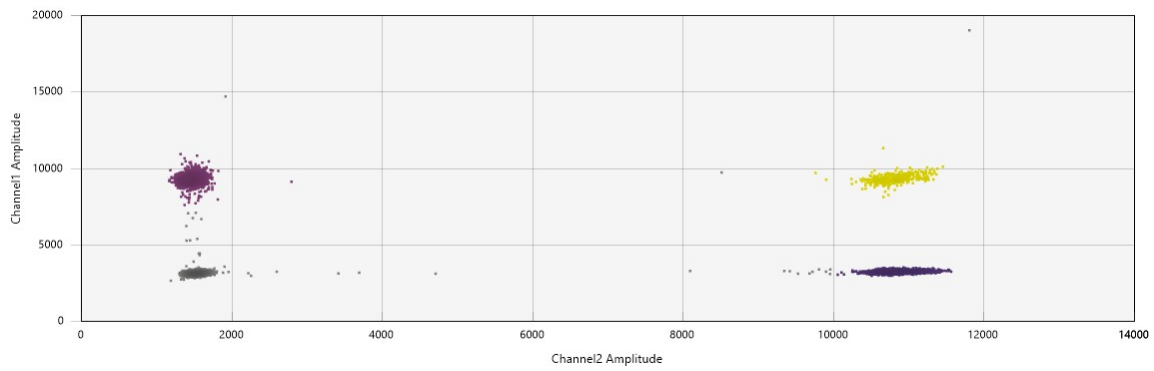

143

144 Norovirus (FAM-Lo), PMMoV (HEX-Lo)

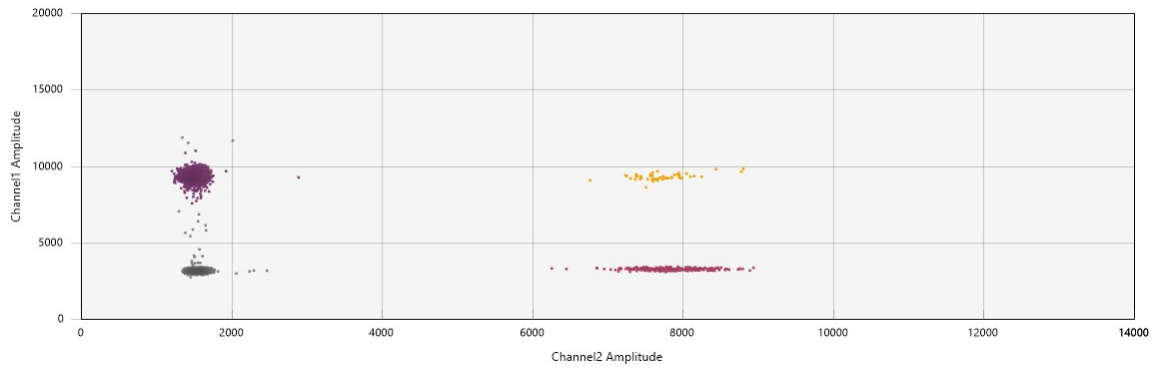

145

146

147

148

149

150

151

152 Influenza A (HEX-Hi), PMMoV (HEX-Lo)

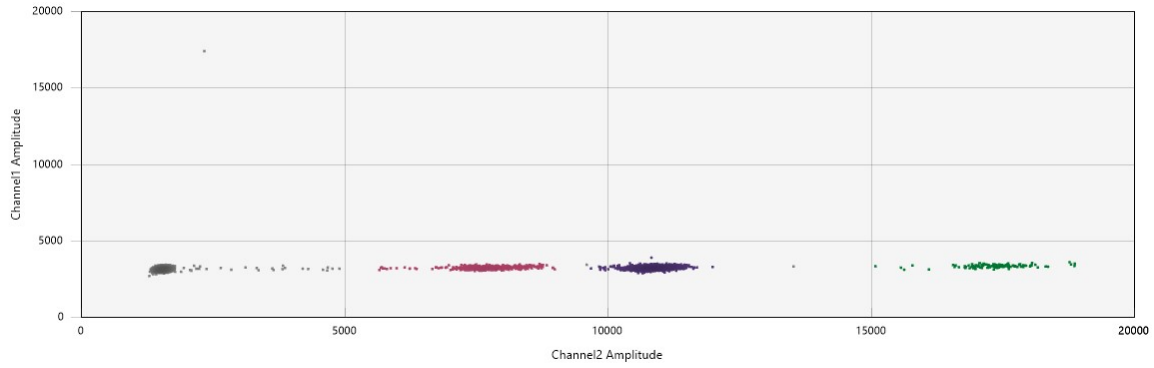

153

154 SARS-CoV-2 (FAM-Hi), norovirus (FAM-Lo), influenza A (HEX-Hi)

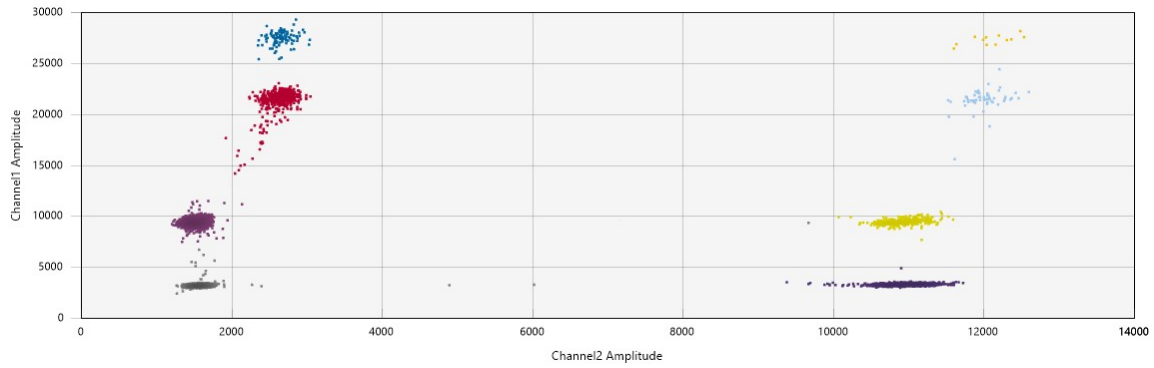

155

156 SARS-CoV-2 (FAM-Hi), norovirus (FAM-Lo), PMMoV (HEX-Lo)

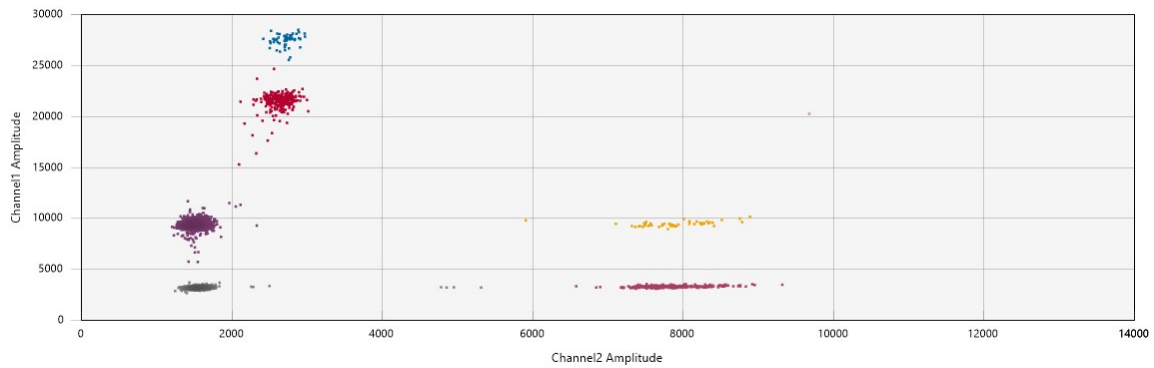

157

158 SARS-CoV-2 (FAM-Hi), norovirus (FAM-Lo), influenza A (HEX-Hi)

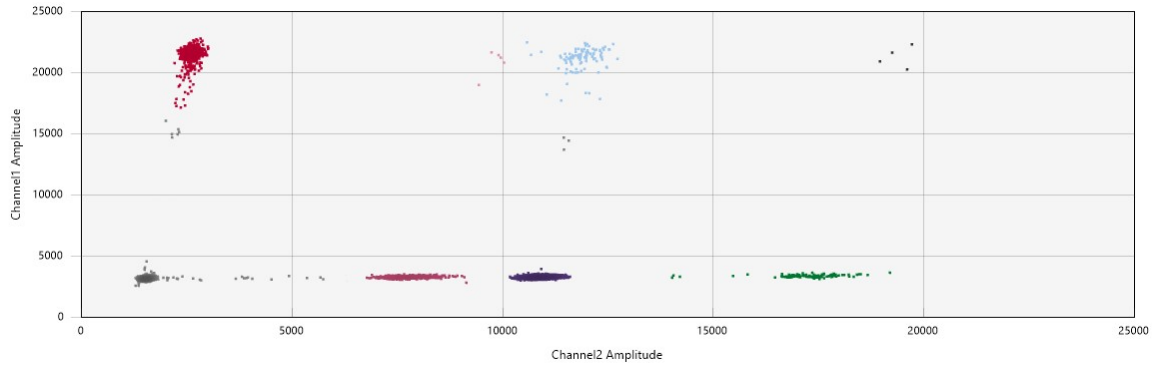

159

Norovir

160 us (FAM-Lo), influenza A (HEX-Hi), PMMoV (HEX-Lo)

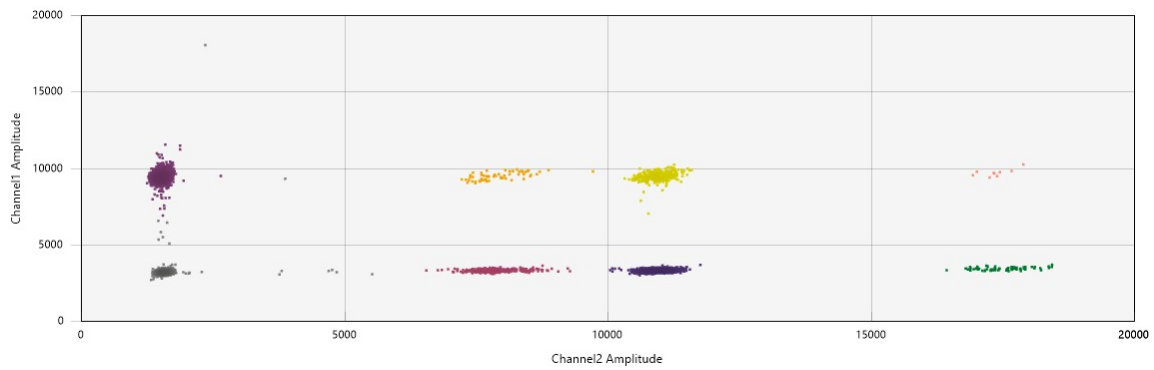

161

162

163

164

165

166

167

168

169

170

171

172

173

174

175

176 **SI Table 1: Naming and abbreviation of each building along with the associated sampling**  
 177 **frequency.**

| <i>Building Name</i>                              | <i>Building Abbreviation</i> | <i>Building Type</i> | <i>Days Sampled</i> |
|---------------------------------------------------|------------------------------|----------------------|---------------------|
| <i>New North Residential College</i>              | NN                           | Dormitory            | M, T, W, Th, F      |
| <i>Pardee/Mark Tower</i>                          | PTD                          | Dormitory            | M, T, W, Th, F      |
| <i>McCarthy Honors Residential College</i>        | MHC                          | Dormitory            | M, W                |
| <i>Cowlings and Ilium Residential College</i>     | CRC                          | Dormitory            | M, W                |
| <i>Cale and Irani Residential College</i>         | CIC                          | Dormitory            | M, W                |
| <i>Nemirovsky and Bohnett Residential College</i> | NBC                          | Dormitory            | M, W                |
| <i>McMorrow Residential College</i>               | MRC                          | Dormitory            | M, W                |
| <i>Cardinal Gardens</i>                           | CAR                          | Apartments           | T, Th               |
| <i>Century Apartments</i>                         | CAP                          | Apartments           | T, Th               |
| <i>Parkside Complex</i>                           | PKD                          | Dormitory            | T, Th               |

178

179 **SI Table 2: Primer and probe composition for ddPCR**

| <i>AMPLICON</i>              | <i>FORWARD PRIMER</i>                     | <i>REVERSE PRIMER</i>                   | <i>SIZE</i> | <i>PROBE SEQUENCE</i>                                    | <i>PRIMER:PROBE CONCENTRATION (nm)</i> | <i>REFERENCE</i> |
|------------------------------|-------------------------------------------|-----------------------------------------|-------------|----------------------------------------------------------|----------------------------------------|------------------|
| <i>SARS-CoV-2_N1</i>         | 5'-/GAC CCC AAA ATC AGC GAA AT/-3'        | 5'-/TCT GGT TAC TGC CAG TTG AAT CTG/-3' | 73          | 5'-/FAM/ACC CCG CAT/ZEN/TAC GTT TGG TGG ACC/IABkFQ/-3'   | 900:250                                | (2)              |
| <i>Influenza-A_M</i>         | 5'-/CAA GAC CAA TCY TGT CAC CTC TGA C/-3' | 5'-/GCA TTY TGG ACA AAV CGT CTA CG/-3'  | 106         | 5'-/HEX/TG CAG TCC T/ZEN/CG CTC ACT GGG CAC G/IABkFQ/-3' | 900:250                                | (3)              |
| <i>Norovirus-GI/GII_ORF2</i> | 5'-/CGC TGG ATG CGN TTC CAT/-3'           | 5'-/CCT TAG ACG CCA TCA TCA TTT AC/-3'  | 86          | 5'-/FAM/TGG ACA GGA/ZEN/GAY CGC RAT CT/IABkFQ/-3'        | 562.5:156.25                           | (4)              |

---

5'-/GAG TGG  
 TTT GAC CTT  
 AAC GTT TGA/-  
 3'

5'-/TTG TCG GTT  
 GCA ATG CAA  
 GT/-3'

5'-/HEX/CCT ACC  
 203 GAA/ZEN/GCA AAT  
 G /IABKFQ/-3'

PMMoV 562.5:156.25 (5)

180 **SI Table 3: cDNA reaction mix volumes and thermocycling conditions**

| 181 | <i>Reagent</i>               | <i>Volume w/ 10%<br/>overage (µL)</i> |
|-----|------------------------------|---------------------------------------|
| 182 | <i>iScript Reaction Mix</i>  | 4.4                                   |
| 183 | <i>Reverse transcriptase</i> | 1.1                                   |
| 184 | <i>Nuclease free water</i>   | 14.3                                  |

185

186

| <i>Sample volume<br/>required per well</i> | <i>Reaction mix<br/>volume per well</i> |
|--------------------------------------------|-----------------------------------------|
| 2 µL                                       | 18 µL                                   |

187

188

189

190

| 191 | <i>Thermocycler step</i>     | <i>Time</i> |
|-----|------------------------------|-------------|
| 192 | <i>iScript Reaction Mix</i>  | 4.4         |
| 193 | <i>Reverse transcriptase</i> | 1.1         |
| 194 | <i>Nuclease free water</i>   | 14.3        |

195

196

197

198 **SI Table 4: ddPCR reaction mix volumes**

| <i>Reagent</i>                    | <i>Volume w/ 10%<br/>overage (µL)</i> |
|-----------------------------------|---------------------------------------|
| SARS-CoV-2_N1 primer/probe        | 2.2                                   |
| Influenza-A_M primer/probe        | 2.2                                   |
| Norovirus-GI_ORF2<br>primer/probe | 2.2                                   |

|     |                                 |     |
|-----|---------------------------------|-----|
| 199 | <i>PMMoV primer/probe</i>       | 2.2 |
| 200 | <i>ddPCR Multiplex Supermix</i> | 6.1 |
| 201 | <i>Nuclease free water</i>      | 8.3 |

|  | <i>Sample volume<br/>required per well</i> | <i>Reaction mix<br/>volume per well</i> |
|--|--------------------------------------------|-----------------------------------------|
|--|--------------------------------------------|-----------------------------------------|

|     |      |       |
|-----|------|-------|
| 204 | 1 µL | 21 µL |
|-----|------|-------|

**SI Table 5: Positive control amplicon sequences**

| <i>Target</i>      | <i>Positive control amplicon</i>                                                                                                                                                                        |
|--------------------|---------------------------------------------------------------------------------------------------------------------------------------------------------------------------------------------------------|
| <i>SARS-CoV-2</i>  | gaccccaaaatcagcgaatgcaccccgattacgtttggtggaccctcagattcaactggcagtaaccagaa                                                                                                                                 |
| <i>Influenza A</i> | caagaccaatctgtcacctctgactaagggaaatgagggttggttcacgctcaccgtgccagtgagcga<br>ggactgcagcgtagacgtttgcctcaaaatgc                                                                                               |
| <i>Norovirus</i>   | cgctggatgcgcttccatgacctcggattgtggacaggagatcgcgatcttctgcccgaattcgtaaattgatga<br>tggcgtctaagg                                                                                                             |
| <i>PMMoV</i>       | gagtggttgacctaacgttgagaggcctaccgaagcaaatgtcgcactgcattgcaaccgacaattacat<br>caaaggaggaagggtcgtgaagattgtgcgacgtaggtgagtcctcaatcaaggaagtgggtcgaa<br>aatcagagatttctatgcttggctaacaggcaacacagtgccgatgagttccaaa |

206

207

**SI Table 6: Limit of detection for viral targets.**

| <i>Target</i>      | <i>LOD<br/>(gc/uL)</i> |
|--------------------|------------------------|
| <i>SARS-CoV-2</i>  | 0.121                  |
| <i>Influenza A</i> | 0.191                  |
| <i>Norovirus</i>   | 0.186                  |

214

215 Calculated using:

216 LoB = mean blank + 1.645(SD blank)

217 LoD = LoB + 1.645(SD low concentration of target)

218

219

220

221 **SI Table 7: Threshold settings for ddPCR partition identification**

| <i>Target</i>                                    | <i>x-axis RFU</i> | <i>y-axis RFU</i> |
|--------------------------------------------------|-------------------|-------------------|
| <i>Negative</i>                                  | 0-5000            | 0-6000            |
| <i>Norovirus</i>                                 | 0-5000            | 6000-15000        |
| <i>SARS-CoV-2</i>                                | 0-5000            | 15000-25000       |
| <i>SARS-CoV-2, norovirus</i>                     | 0-5000            | 25000-30000       |
| <i>PMMoV</i>                                     | 5000-9000         | 0-6000            |
| <i>Norovirus, PMMoV</i>                          | 5000-9000         | 6000-15000        |
| <i>SARS-CoV-2, PMMoV</i>                         | 5000-9000         | 15000-25000       |
| <i>SARS-CoV-2, norovirus, PMMoV</i>              | 5000-9000         | 25000-30000       |
| <i>Influenza A</i>                               | 9000-15000        | 0-6000            |
| <i>Influenza A, norovirus</i>                    | 9000-15000        | 6000-15000        |
| <i>SARS-CoV-2, influenza A</i>                   | 9000-15000        | 15000-25000       |
| <i>SARS-CoV-2, influenza A, norovirus</i>        | 9000-15000        | 25000-30000       |
| <i>Influenza A, PMMoV</i>                        | 15000-20000       | 0-6000            |
| <i>Norovirus, influenza A, PMMoV</i>             | 15000-20000       | 6000-15000        |
| <i>SARS-CoV-2, influenza A, PMMoV</i>            | 15000-20000       | 15000-25000       |
| <i>SARS-CoV-2, influenza A, norovirus, PMMoV</i> | 15000-20000       | 25000-30000       |

222

223

224

225 **SI Table 8: Log10 of SARS-CoV-2, influenza A, norovirus, and PMMoV per resident of the**  
 226 **sampled building. All pathogens were normalized by PMMoV. ND represents non-detect.**

| Site ID               | SARS-CoV-2 |         | Influenza A |         | Norovirus |         | PMMoV |           |
|-----------------------|------------|---------|-------------|---------|-----------|---------|-------|-----------|
|                       | Mean       | Range   | Mean        | Range   | Mean      | Range   | Mean  | Range     |
| <i>CAP</i><br>(n=57)  | 3.10       | ND-4.35 | 3.19        | ND-4.76 | 3.08      | ND-4.75 | 5.71  | 3.91-6.73 |
| <i>CAR</i><br>(n=50)  | 2.80       | ND-3.84 | 3.07        | ND-4.71 | 2.03      | ND-3.73 | 5.61  | 3.42-7.00 |
| <i>CIC</i><br>(n=44)  | 3.22       | ND-4.62 | 2.14        | ND-3.67 | ND        | ND      | 6.03  | 3.36-7.46 |
| <i>CRC</i><br>(n=38)  | 2.60       | ND-3.87 | 1.15        | ND-2.68 | 2.40      | ND-3.97 | 6.38  | 4.09-7.32 |
| <i>MHC</i><br>(n=42)  | 2.84       | ND-4.05 | 1.94        | ND-3.28 | -0.25     | ND-1.14 | 5.95  | 3.40-6.69 |
| <i>MRC</i><br>(n=41)  | 3.00       | ND-4.28 | 2.40        | ND-3.84 | 2.33      | ND-3.85 | 5.85  | 3.39-6.68 |
| <i>NBC</i><br>(n=55)  | 3.55       | ND-4.67 | 3.74        | ND-5.09 | 0.51      | ND-2.24 | 5.81  | 3.44-7.01 |
| <i>NN</i><br>(n=114)  | 3.05       | ND-4.64 | 2.58        | ND-4.22 | 0.45      | ND-2.12 | 6.00  | 3.52-7.29 |
| <i>PKD</i><br>(n=56)  | 3.24       | ND-4.86 | 2.51        | ND-3.97 | 2.45      | ND-4.18 | 5.56  | 3.33-7.29 |
| <i>PTD</i><br>(n=110) | 2.91       | ND-4.25 | 3.06        | ND-4.97 | 1.44      | ND-3.41 | 5.56  | 3.49-6.56 |

227

228

229

230

231

232

233

234

235

236

237





240 **References**

- 241 1. Crank K, Papp K, Barber C, Wang P, Bivins A, Gerrity D. Correspondence on “The  
242 Environmental Microbiology Minimum Information (EMMI) Guidelines: qPCR and dPCR  
243 Quality and Reporting for Environmental Microbiology.” *Environ Sci Technol*. 2023 Dec  
244 5;57(48):20448–9.
- 245 2. Lu X, Wang L, Sakthivel SK, Whitaker B, Murray J, Kamili S, et al. US CDC Real-Time  
246 Reverse Transcription PCR Panel for Detection of Severe Acute Respiratory Syndrome  
247 Coronavirus 2. *Emerg Infect Dis*. 2020 Aug;26(8):1654–65.
- 248 3. CDC. Centers for Disease Control and Prevention. 2020 [cited 2023 Jan 29]. Research Use  
249 Only CDC Flu SC2 Multiplex Assay Primers and Probes. Available from:  
250 <https://www.cdc.gov/coronavirus/2019-ncov/lab/multiplex.html>
- 251 4. Butot S, Le Guyader FS, Krol J, Putallaz T, Amoroso R, Sánchez G. Evaluation of various  
252 real-time RT-PCR assays for the detection and quantitation of human norovirus. *J Virol*  
253 *Methods*. 2010 Jul;167(1):90–4.
- 254 5. Lee HW. Pretreatment with propidium monoazide/sodium lauroyl sarcosinate improves  
255 discrimination of infectious waterborne virus by RT-qPCR combined with magnetic  
256 separation. *Environmental Pollution*. 2018 Feb;233:306–14.

257
